# Supplementary material for: Synthesis of Ni–Ag–ZnO solid solution nanoparticles for photoreduction and antimicrobial applications
Source: Royal Society of Chemistry journal article supplement (doi:10.1039/d2ra00717g), 2022-01-01
Supplement: d2ra00717g1.pdf [file d2ra00717g1.pdf]

## Supporting Information

### Synthesis of Ni-Ag-ZnO Solid Solutions Nanoparticles for Photoreduction and Antimicrobial Applications

Sania Naseer,<sup>a</sup> Muhammad Aamir,<sup>a\*</sup> Muhammad Aslam Mirza,<sup>a</sup> Uzma Jabeen,<sup>b</sup> Raja Tahir,<sup>c</sup> Muhammad Najam Khan Malghani,<sup>d</sup> and Qamar Wali<sup>c</sup>

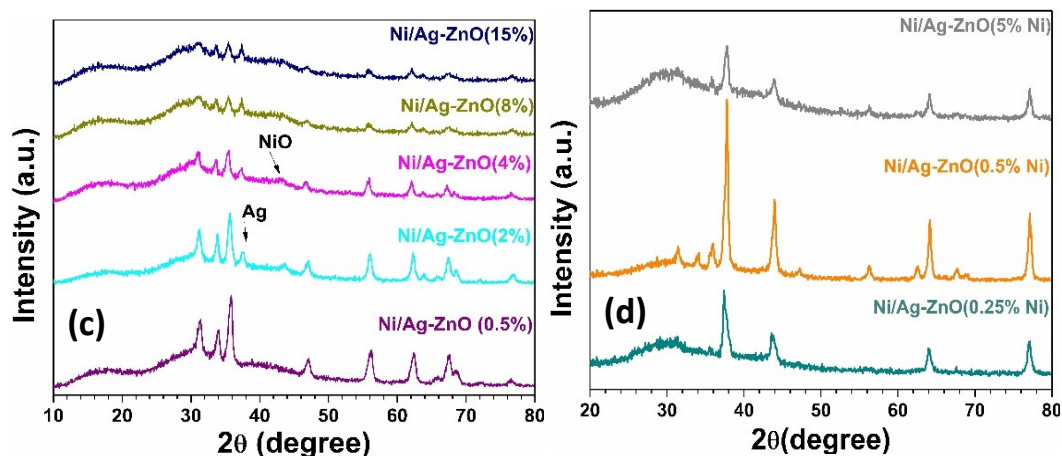

**Figure S1** Comparative XRD spectra of (a) pure ZnO, Ni-ZnO (1:1 molar ratio) and Ag-ZnO (1:1 molar ratio) NPs samples. (b) Focused spectra indicate the shift in diffraction peak by the Ni and Ag incorporation in ZnO.

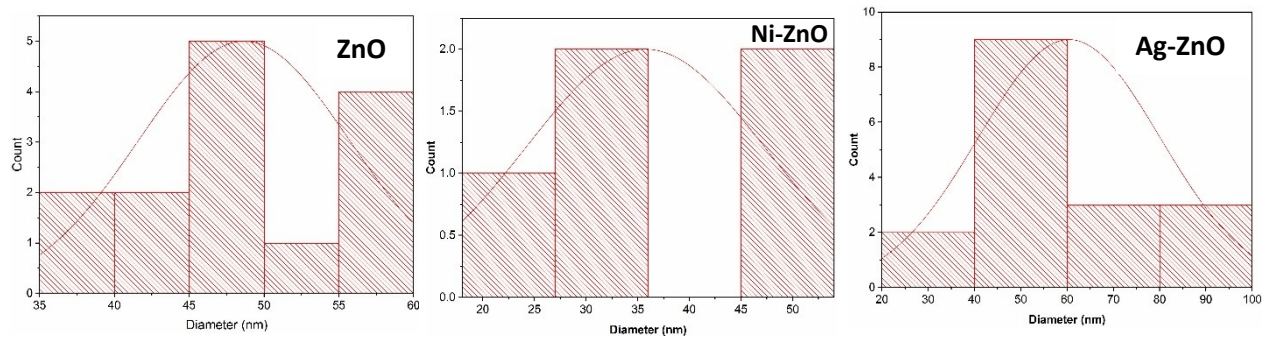

**Figure S2.** Size distribution histograms of (a) ZnO (b) Ni-ZnO (c) Ag-ZnO

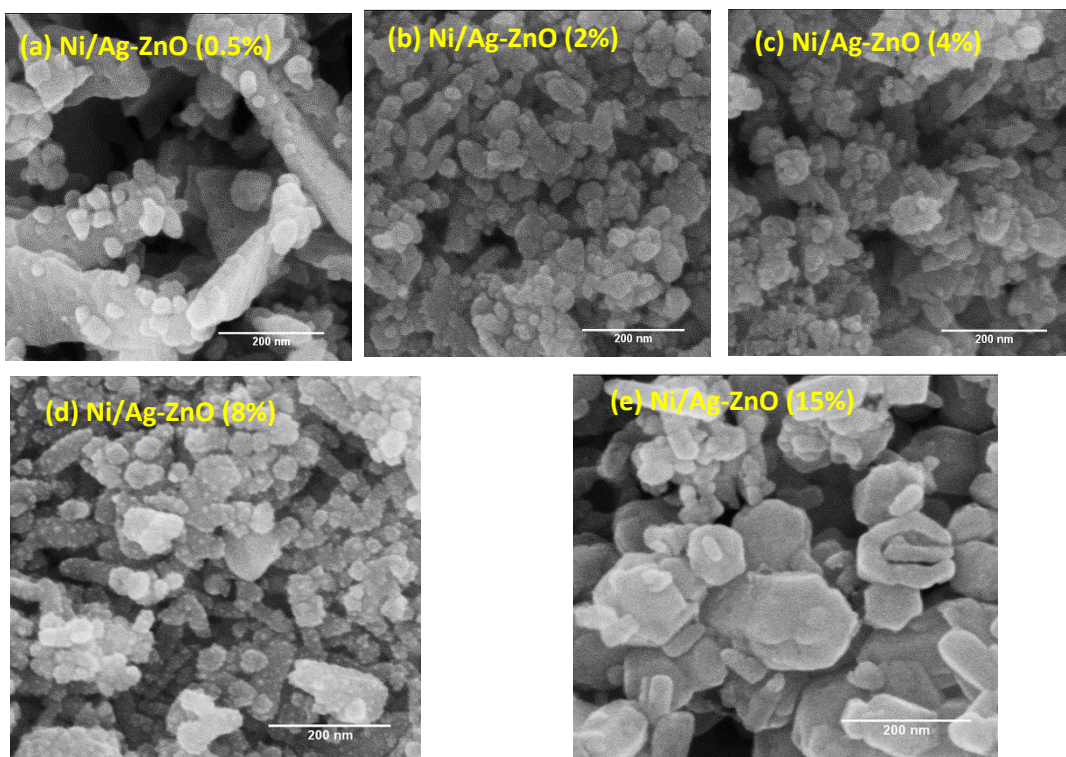

**Figure S3.** SEM micrographs of (a) Ni/Ag-ZnO (0.5%) (b) Ni/Ag-ZnO (2%) (c) Ni/Ag-ZnO (4%) (d) Ni/Ag-ZnO (8%) (e) Ni/Ag-ZnO (15%)

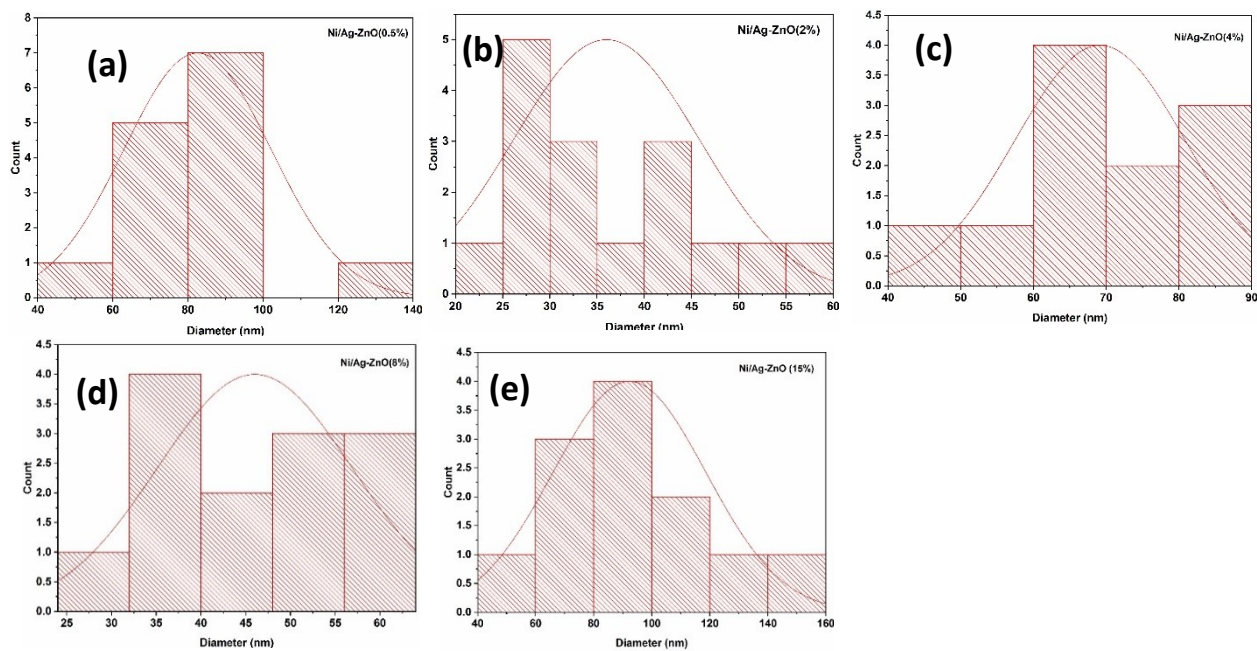

**Figure S4.** Particle size histograms of (a) Ni/Ag-ZnO(0.5%) (b) Ni/Ag-ZnO(2%) (c) Ni/Ag-ZnO(4%) (d) Ni/Ag-ZnO (8%) (e) Ni/Ag-ZnO (15%).

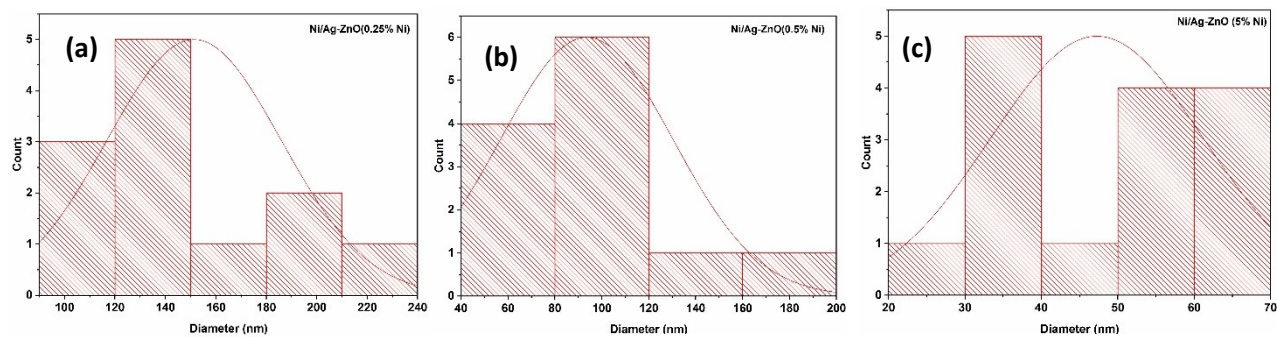

**Figure S5.** Particle size distribution graphs of (a) Ni/Ag-ZnO(0.25% Ni) (b) Ni/Ag-ZnO (0.5% Ni) (c) Ni/Ag-ZnO (5% Ni).

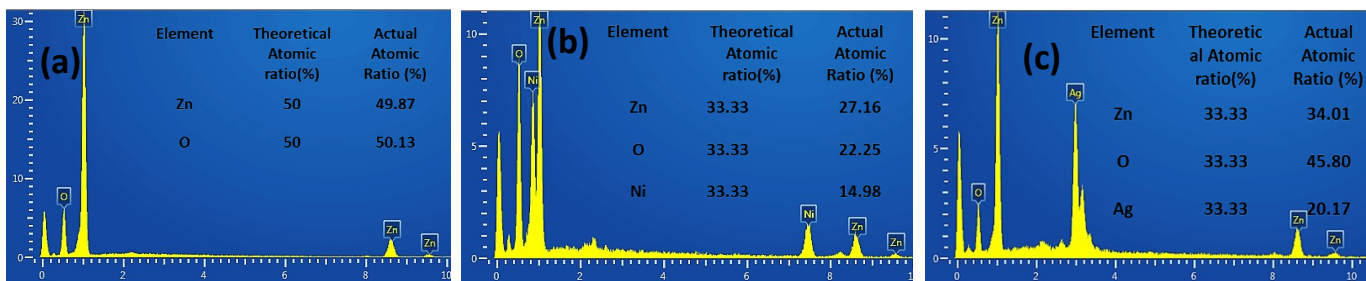

**Figure S6.** EDS spectra and elemental compositions of (a) ZnO (1:1) (b) Ni-ZnO (1:1) (c) Ag-

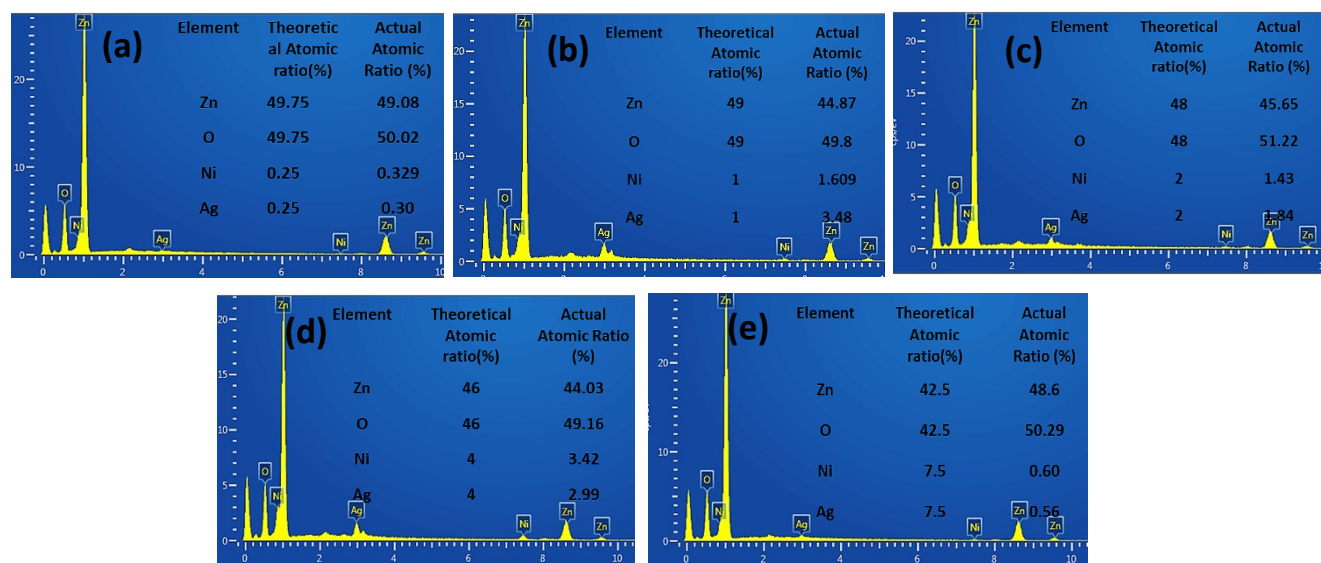

ZnO (1:1).

**Figure S7.** EDS spectra and elemental composition of (a) Ni/Ag-ZnO(0.5%) (b) Ni/Ag-

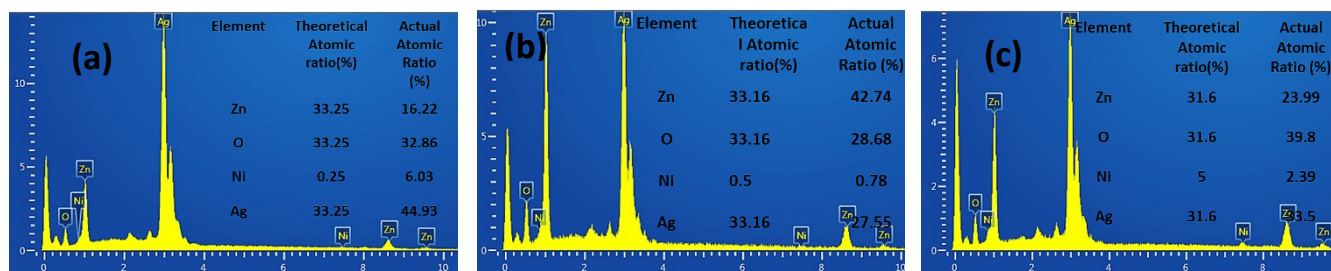

ZnO(2%) (c) Ni/Ag-ZnO(4%) (d) Ni/Ag-ZnO(8%) (e) Ni/Ag-ZnO(15%)

**Figure S8.** EDS spectra and elemental composition of (a) Ni/Ag-ZnO(0.25% Ni) (b) Ni/Ag-ZnO(0.5% Ni) (c) Ni/Ag-ZnO(5% Ni)

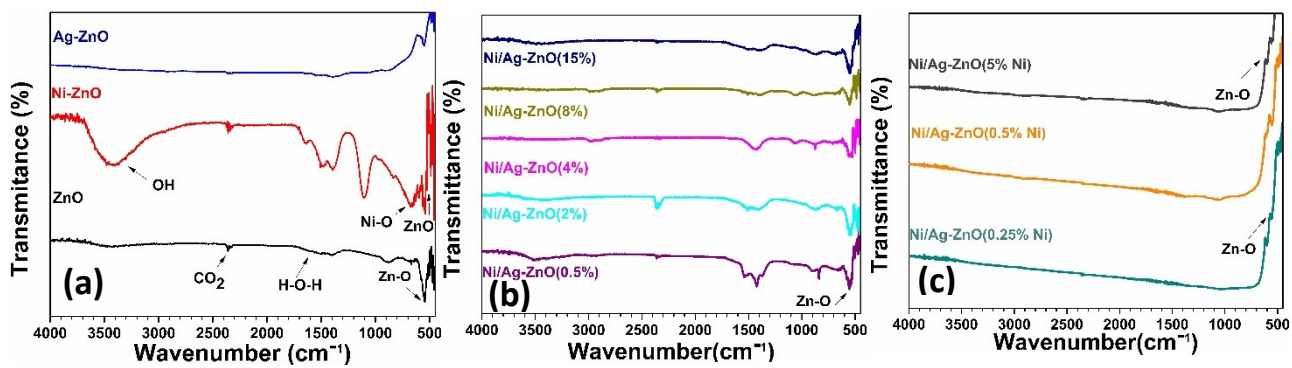

**Figure S9.** FTIR spectra of (a) pure ZnO, Ni-ZnO (1:1), and Ag-ZnO (1:1), (b) Ni/Ag-ZnO (0.5, 2, 4, 8, 15%), (c) Ni/Ag-ZnO (0.25, 0.5, 5% Ni).

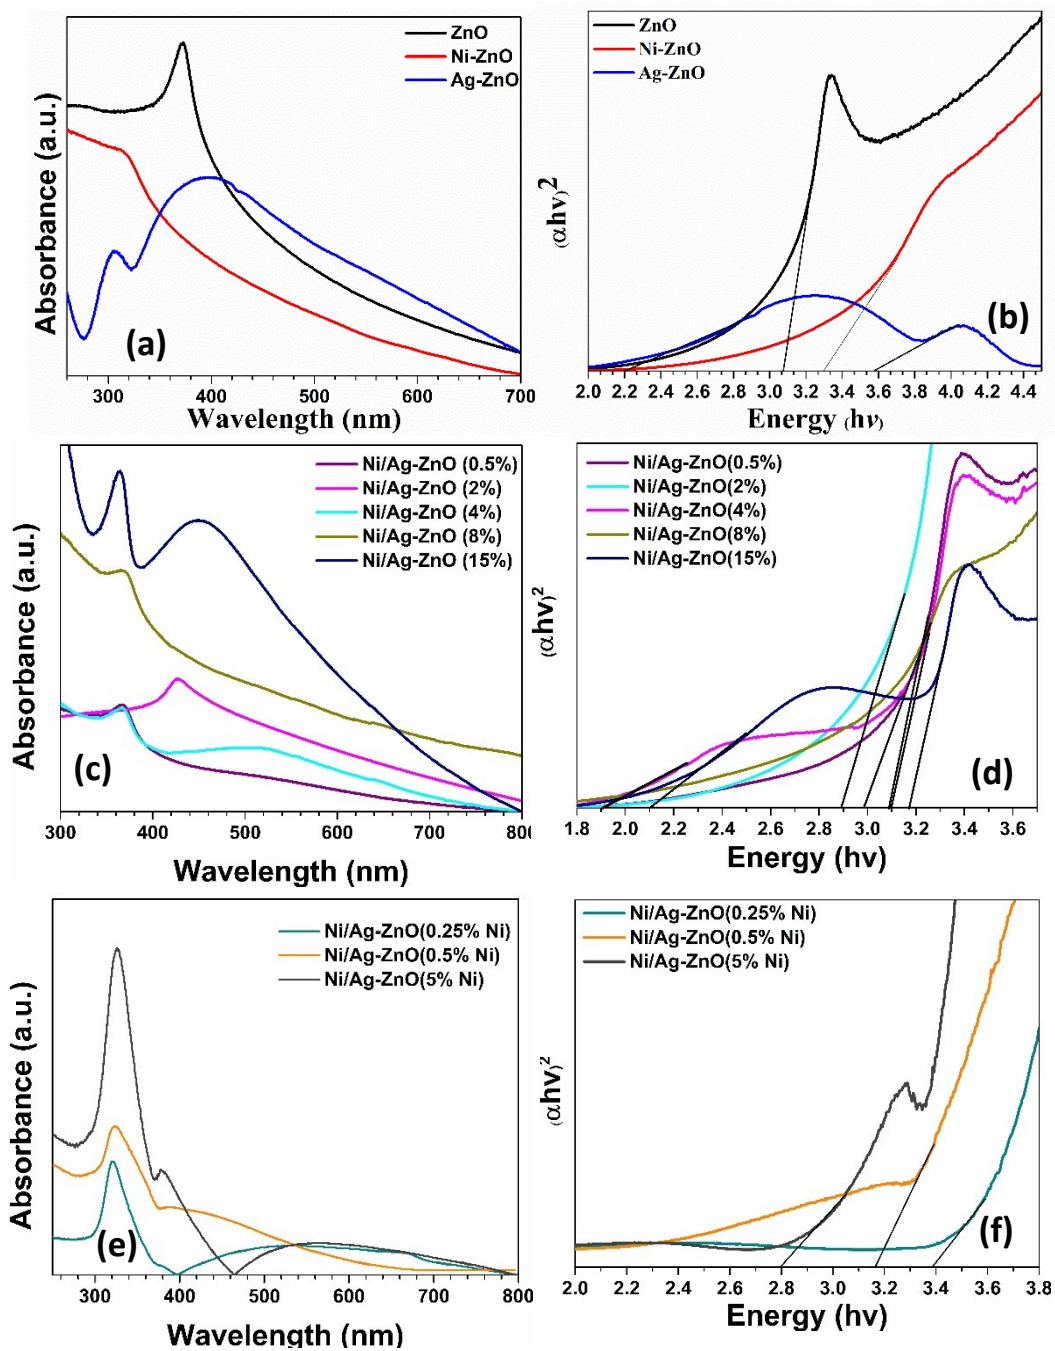

**Figure S10.** UV-vis absorption spectra of pure ZnO, Ni-ZnO and Ag-ZnO and (b) is the Tauc's plot of pure ZnO, Ni-ZnO and Ag-ZnO (c-d) Ni/Ag-ZnO (0.5, 2, 4, 8, 15%), and (e-f) Ni/Ag-ZnO (0.25, 0.5, 5% Ni).

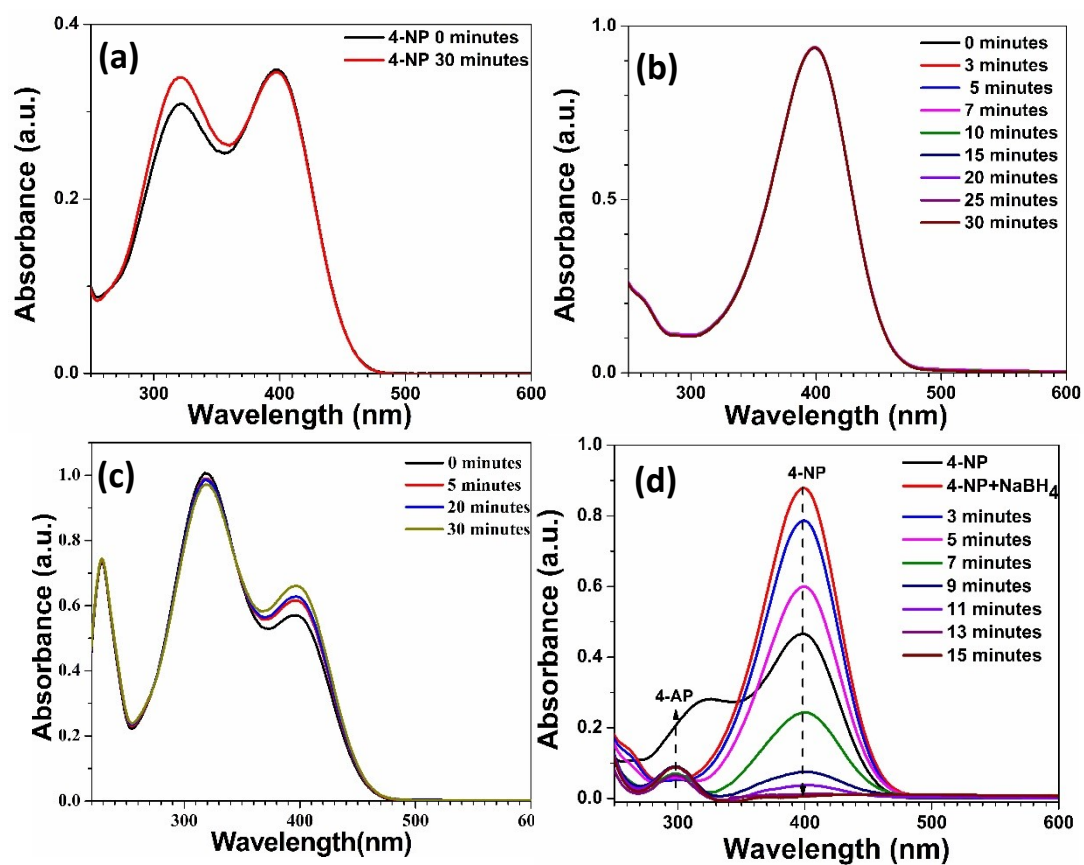

**Figure S11.** UV-Vis absorption spectra of (a) 4-NP (b) 4-NP + NaBH<sub>4</sub> (c) 4-NP + catalyst and (d) 4-NP + NaBH<sub>4</sub> + catalyst under light irradiations.

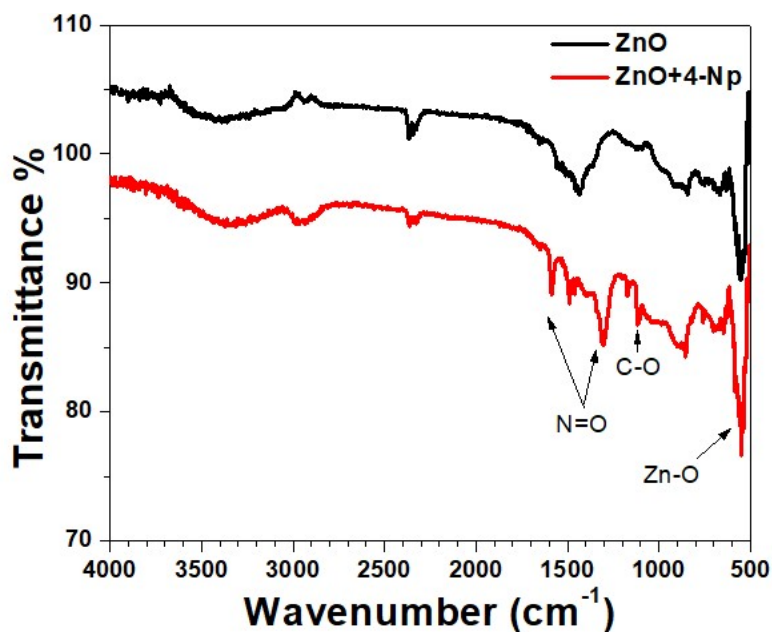

**Figure S12.** FTIR spectrum of untreated ZnO NPs and 4-nitrophenolate solution treated ZnO NPs.

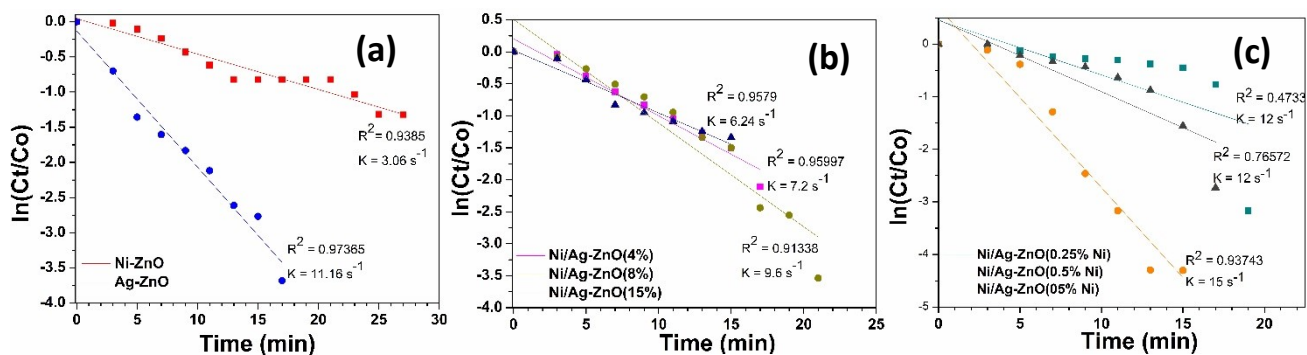

**Figure S13.** Kinetics studies of 4-NP reduction (a)  $\ln(ct/Co)$  vs  $t$  graph of Ni and Ag-ZnO (b)  $\ln(ct/Co)$  vs  $t$  graph of Ni/Ag-ZnO (4, 8, 15%) (c)  $\ln(ct/Co)$  vs  $t$  graph of Ni-Ag-ZnO (0.25, 0.5, 5% Ni).



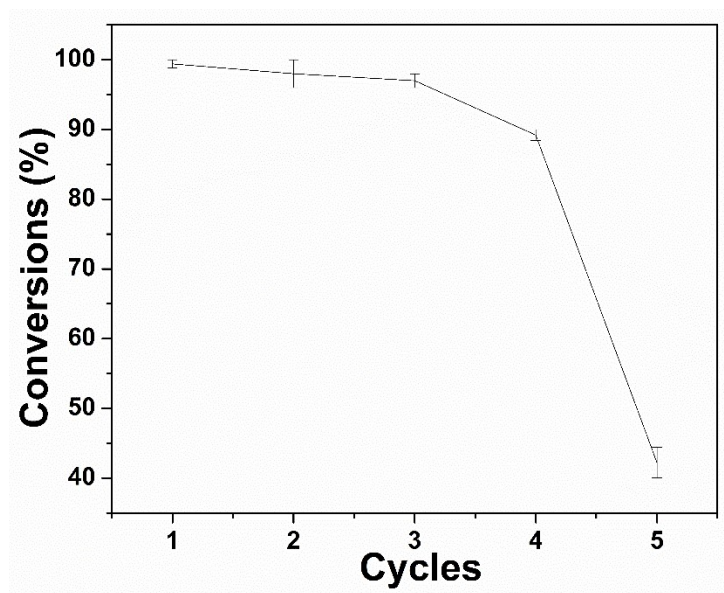

Figure S14. Conversion efficiency of as prepared nanoparticles.

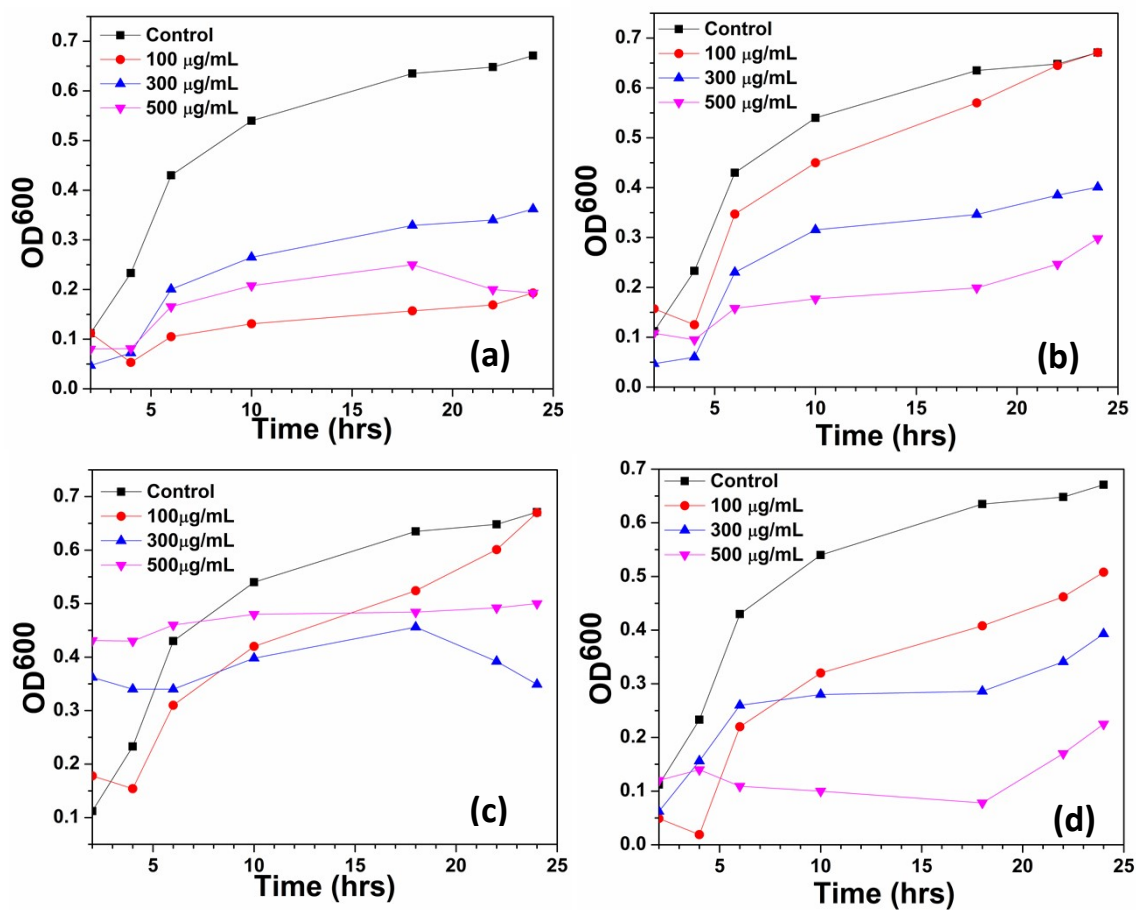

**Figure S15** Growth inhibition pattern of *E. coli* by (a) Ni-ZnO (b) Ag-ZnO Growth inhibition pattern of *E. coli* by (a) Ni/Ag-ZnO (8%) (b) Ni/Ag-ZnO (5% Ni)

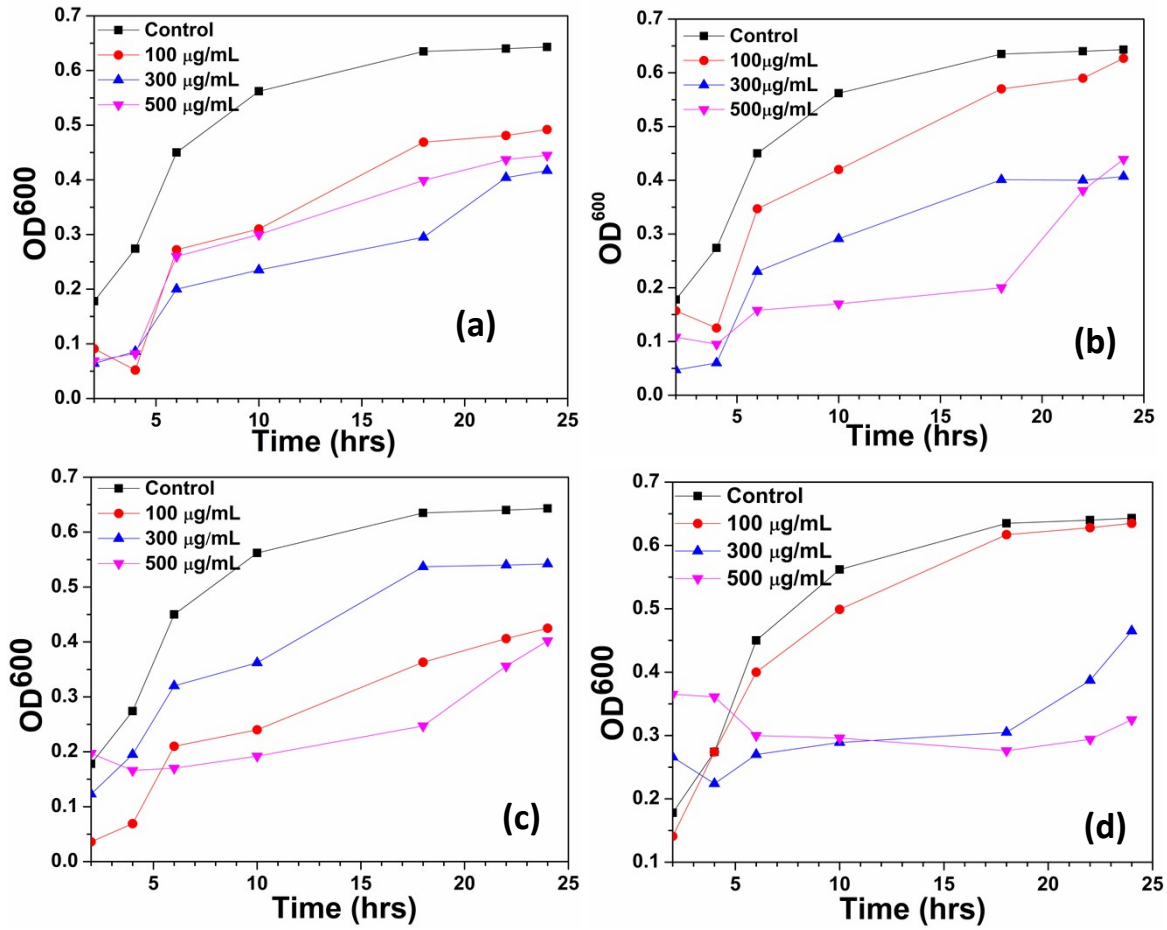

**Figure S16** Growth inhibition pattern of *S. aureus* by (a) Ni-ZnO (b) Ag-ZnO (c) Ni/Ag-ZnO (8%) (d) Ni/Ag-ZnO (5% Ni)

| Catalyst | Catalyst loading    | Reaction time         | References       |
|----------|---------------------|-----------------------|------------------|
| Bare ZnO | 30 mg               | No conversion         | present work     |
| Ag NPs   | 30 uL, 20 mg, 10 uL | 12 min, 45 min, 8 min | <sup>1,2,3</sup> |
| Ni NPs   | -                   | 16 min.               | <sup>4</sup>     |
| Ag-ZnO   | 30 mg               | 17 min.               | Present work     |
| Ni-ZnO   | 30 mg               | 27 min.               | present work     |

**Table S1.** Performance comparison of bare ZnO, Ag and Ni NPs, and Ag, Ni doped ZnO NPs based catalyst

**Table S2.** The information on lattice parameters of of pure ZnO and solid solutions of Ni/Ag-ZnO.

| Catalysts             | Lattice Parameters<br>(Å) |         | c/a ratio | Volume of Lattice<br>(Å) <sup>3</sup> |
|-----------------------|---------------------------|---------|-----------|---------------------------------------|
|                       | a                         | c       |           |                                       |
| Pure ZnO              | 3.27237                   | 5.24424 | 1.602582  | 48.6338                               |
| Ni-ZnO                | 5.25877                   | 4.13472 | 0.786252  | 99.0252                               |
| Ag-ZnO                | 5.10661                   | 4.45977 | 0.873333  | 100.7186                              |
| Ni/Ag-ZnO (0.5%)      | 4.35472                   | 4.36707 | 1.002836  | 71.7201                               |
| Ni/Ag-ZnO (2%)        | 5.02675                   | 4.37858 | 0.871056  | 95.8163                               |
| Ni/Ag-ZnO (4%)        | 5.06451                   | 4.40038 | 0.868866  | 97.7451                               |
| Ni/Ag-ZnO (8%)        | 4.9832                    | 4.25153 | 0.853173  | 91.431                                |
| Ni/Ag-ZnO (15%)       | 5.06384                   | 4.35156 | 0.85934   | 96.6352                               |
| AgZnO(1:1)/Ni(0.25%)  | 4.730665                  | 4.4134  | 0.932934  | 86.22098                              |
| Ag-ZnO(1:1)/Ni(0.25%) | 4.9326                    | 4.39713 | 0.891443  | 92.6512                               |
| Ag-ZnO(1:1)/Ni(0.25%) | 5.18904                   | 4.57409 | 0.881491  | 106.6621                              |

## References:

1. Safari, J.; Enayati Najafabadi, A.; Zarnegar, Z.; Farkhonde Masoule, S. J. G. C. L.; Reviews, Catalytic performance in 4-nitrophenol reduction by Ag nanoparticles stabilized on biodegradable amphiphilic copolymers. **2016**, *9* (1), 20-26.
2. Saha, S.; Pal, A.; Kundu, S.; Basu, S.; Pal, T. J. L., Photochemical green synthesis of calcium-alginate-stabilized Ag and Au nanoparticles and their catalytic application to 4-nitrophenol reduction. **2010**, *26* (4), 2885-2893.
3. Kaur, J.; Singh, J.; Rawat, M. J. S. A. S., An efficient and blistering reduction of 4-nitrophenol by green synthesized silver nanoparticles. **2019**, *1* (9), 1-6.
4. Jiang, Z.; Xie, J.; Jiang, D.; Wei, X.; Chen, M. J. C., Modifiers-assisted formation of nickel nanoparticles and their catalytic application to p-nitrophenol reduction. **2013**, *15* (3), 560-569.
